# Supplementary material for: Molecularly defined circuits for cardiovascular and cardiopulmonary control
Source: PubMed Central journal article supplement (PMC9297035; doi:10.1038/s41586-022-04760-8), 2022-06-01
Supplement: NIHMS1818629-supplement-Supplementary_Table_6.pdf [file NIHMS1818629-supplement-Supplementary_Table_6.pdf]

Supplementary Table 6. Selected genes enriched<sup>1</sup> in ACP or ACV neurons arranged by function

| Known or predicted function              | ACP                                                                   | ACV                                                                      |
|------------------------------------------|-----------------------------------------------------------------------|--------------------------------------------------------------------------|
| Transcription factor                     | <b><i>Tbx2, Onecut1, Onecut3, Eya4, Pou4f1</i></b>                    | <b><i>Hoxa5, Hoxc4, Hoxb5, Hoxc5</i></b>                                 |
| Neuronal development                     | <b><i>Tenm1, Mab21l2, Plxdc2</i></b>                                  | <b><i>Adamts18</i></b>                                                   |
| Neurite outgrowth                        | <b><i>Dpy19l1</i></b>                                                 | <b><i>Cd9, Socs2, Dgkg</i></b>                                           |
| Neuron repulsion                         | <i>Megf11</i>                                                         |                                                                          |
| Axon outgrowth                           | <i>Rasgrf1</i>                                                        |                                                                          |
| Axon guidance                            | <b><i>Sema3d, Sema3c, Ptprd, Rgmb, Gfra2, Ntng2, Dcc</i></b>          | <i>Gfra1</i>                                                             |
| Cell adhesion                            | <b><i>Cntn4, Pcdh18, Cldn1, Pcdh10, Cdh2, Cbln2, Cntn3, Cntn6</i></b> | <b><i>Ctnna2, Cd24a, Cd44</i></b>                                        |
| Synapse formation                        | <b><i>Slitrk5</i></b>                                                 |                                                                          |
| Motor neuron survival                    | <i>Lifr</i>                                                           | <b><i>Arg1</i></b>                                                       |
| Ion channel                              | <b><i>Kcnn2, Kcnj12</i></b>                                           | <b><i>Ano2</i></b>                                                       |
| Calcium buffer                           | <b><i>Calb1</i></b>                                                   |                                                                          |
| Neuropeptide                             | <b><i>Uts2b</i></b>                                                   |                                                                          |
| Neuropeptide receptor                    | <b><i>Trhr, Tacr3, Mc4r, Cckbr, Agtr1b</i></b>                        | <b><i>Sstr5, Sstr2, P2ry1</i></b>                                        |
| Circulating hormone receptor             |                                                                       | <b><i>Ghsr, Rxfp2, Lepr</i></b>                                          |
| Neuropeptide degrading enzyme            | <b><i>Trhde</i></b>                                                   |                                                                          |
| Neurotransmitter receptor                | <b><i>Gabre, Gabrq, Adra2a</i></b>                                    | <b><i>Htr3b</i></b>                                                      |
| Nonspecific cholinesterase               |                                                                       | <b><i>Bche</i></b>                                                       |
| Regulation of neurotransmitter signaling | <i>Tmem163, Agtrap</i>                                                |                                                                          |
| Synaptic vesicle release                 | <i>Sv2b</i>                                                           |                                                                          |
| Synaptic plasticity                      |                                                                       | <b><i>Akap7</i></b>                                                      |
| Protease                                 | <b><i>Pappa2</i></b>                                                  |                                                                          |
| Thyroid hormone transporter              | <b><i>Slc16a2</i></b>                                                 |                                                                          |
| Extracellular matrix                     | <b><i>Sgcz</i></b>                                                    |                                                                          |
| Cytoskeletal regulation                  | <b><i>Avil</i></b>                                                    |                                                                          |
| lncRNA                                   | <b><i>Gm16551</i></b>                                                 |                                                                          |
| Other signaling                          | <i>Thsd7a, Gulp1, Csm1, Rgs8, Bambi</i>                               | <b><i>Plcb4, Adcy8, Igf1, Dlc1, Mfng, Tspan18</i></b>                    |
| Unknown function                         | <b><i>D930028M14Rik, Slc35f4, Tmem47, Lcp1, Lancl3, Vwa7</i></b>      | <b><i>Parm1, Pacrg, Cpne8, Thsd7b, Susd5, Tmem178, Egfem1, Il17f</i></b> |

<sup>1</sup> Boldface genes were not expressed in Amb<sup>Laryngeal</sup> neurons
