# Supplementary material for: Molecularly defined circuits for cardiovascular and cardiopulmonary control
Source: PubMed Central journal article supplement (PMC9297035; doi:10.1038/s41586-022-04760-8), 2022-06-01
Supplement: NIHMS1818629-supplement-Supplementary_Table_7.pdf [file NIHMS1818629-supplement-Supplementary_Table_7.pdf]

Supplementary Table 7. Projection targets of single ACP neurons

| Clone ID    | Method                          | Amb injected | Cardiac ganglion | Lung ganglion <sup>1</sup> | Innervated neurons <sup>2</sup> | Total neurons in ganglion | % of ganglion innervated |
|-------------|---------------------------------|--------------|------------------|----------------------------|---------------------------------|---------------------------|--------------------------|
| Clone #1    | <i>Calb1<sup>2a-dgCre</sup></i> | Left         | Ganglion 1       |                            | 16                              | 156                       | 10                       |
|             |                                 |              |                  | RCr 1                      | 3                               | 109                       | 3                        |
|             |                                 |              |                  | RCd 2                      | 3                               | 51                        | 6                        |
|             |                                 |              |                  | RCd 3                      | 2                               | 6                         | 33                       |
|             |                                 |              |                  | RCd 4                      | 8                               | 17                        | 47                       |
|             |                                 |              |                  | RCd 5                      | 7                               | 25                        | 28                       |
|             |                                 |              |                  | RCd 6                      | 3                               | 5                         | 60                       |
|             |                                 |              |                  | RCd 7                      | 3                               | 18                        | 16                       |
| Heart total |                                 |              |                  | 16                         | 156                             | 10                        |                          |
| Lung total  |                                 |              |                  | 29                         | 231                             | 13                        |                          |
| Grand total |                                 |              |                  | 45                         |                                 |                           |                          |
| Clone #2    | <i>Ghsr<sup>Cre</sup></i>       | Right        | Ganglion 1       |                            | 8                               | 124                       | 6                        |
|             |                                 |              |                  | Ganglion 2                 | 4                               | 160                       | 3                        |
|             |                                 |              |                  | L 1                        | 4                               | 51                        | 8                        |
|             |                                 |              |                  | L 2                        | 4                               | 4                         | 100                      |
|             |                                 |              |                  | L 3                        | 3                               | 3                         | 100                      |
|             |                                 |              |                  | L 4                        | 3                               | 10                        | 30                       |
|             |                                 |              |                  | L 5                        | 3                               | 9                         | 33                       |
|             |                                 |              |                  | L 6                        | 4                               | 8                         | 50                       |
|             |                                 |              |                  | L 7                        | 1                               | 3                         | 33                       |
|             |                                 |              |                  | L 8                        | 3                               | 3                         | 100                      |
| Heart total |                                 |              |                  | 12                         | 284                             | 4                         |                          |
| Lung total  |                                 |              |                  | 25                         | 91                              | 27                        |                          |
| Grand total |                                 |              |                  | 37                         |                                 |                           |                          |
| Clone #3    | <i>Calb1<sup>Cre</sup></i>      | Left         | Ganglion 1       |                            | 12                              | 212                       | 6                        |
|             |                                 |              |                  | RMD 1                      | 10                              | 56                        | 18                       |
|             |                                 |              |                  | Heart total                |                                 |                           | 12                       |
| Lung total  |                                 |              |                  | 10                         | 56                              | 18                        |                          |
| Grand total |                                 |              |                  | 22                         |                                 |                           |                          |

<sup>1</sup> Ganglia targeted by single clones are described in proximal-distal order along the airway.

<sup>2</sup> Targeted cells within each ganglion were defined as those surrounded by a clear, GFP+ pericellular basket and represents a minimum number of neurons contacted. Abbreviations: L, left lobe; RCr, right cranial lobe; RMD, right medial lobe; RCd, right caudal lobe. The extrapulmonary airways and the right accessory lobes were not examined.
